# Supplementary material
Source: PubMed Central journal article supplement (PMC4936032)

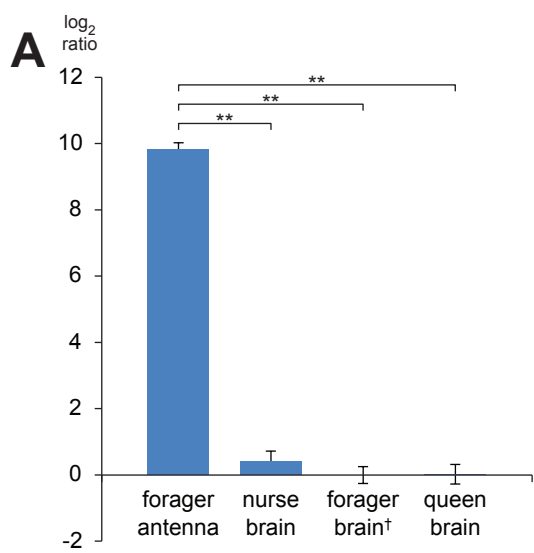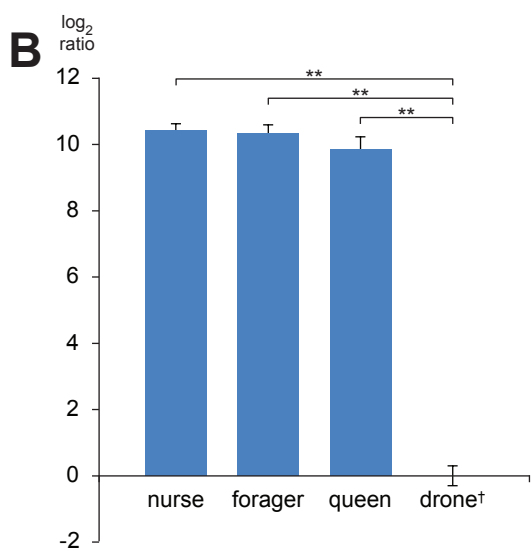

log<sub>2</sub> ratio

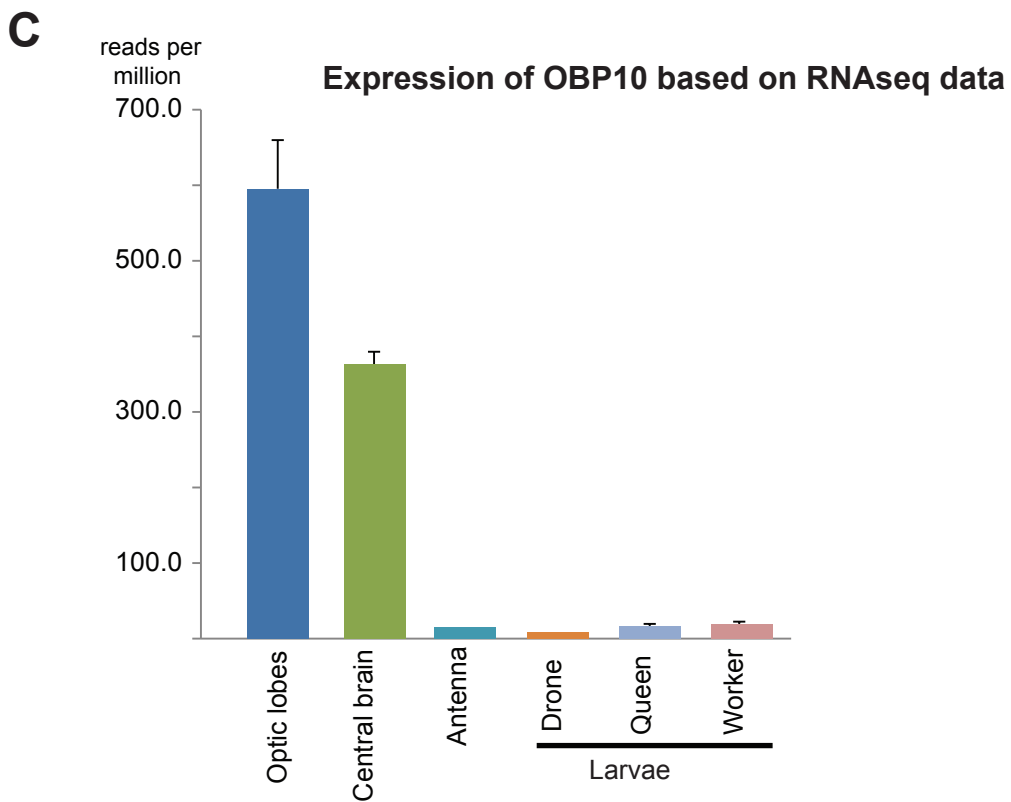

Supplement: rspb20160558supp1.pdf [file rspb20160558supp1.pdf]
